# Supplementary material for: Genomic reconstruction of transcriptional regulatory networks in lactic acid bacteria
Source: PubMed Central journal article supplement (PMC3616900; doi:10.1186/1471-2164-14-94), 2013-02-12
Supplement: 1471-2164-14-94-S9.pdf [file 1471-2164-14-94-S9.pdf]

Additional file 9. Comparison of predicted binding site motifs in *Streptococcaceae* and *Lactobacillaceae*.

| TFs   | Predicted site motif in <i>Streptococcaceae</i> |                 | Predicted site motif in <i>Lactobacillaceae</i> |                 | Category <sup>3</sup> | Genomes <sup>4</sup> | Target operons <sup>5</sup> |
|-------|-------------------------------------------------|-----------------|-------------------------------------------------|-----------------|-----------------------|----------------------|-----------------------------|
|       | Motif sequence Logo <sup>1</sup>                | NS <sup>2</sup> | Motif sequence Logo <sup>1</sup>                | NS <sup>2</sup> |                       |                      |                             |
| AdcR  |                                                 | 69              |                                                 | 2               | I                     | 16                   | 4.3                         |
| AgaR2 |                                                 | 5               |                                                 | 6               | I                     | 9                    | 1.1                         |
| ArgR  |                                                 | 91              |                                                 | 21              | I                     | 25                   | 4.1                         |
| BirA  |                                                 | 28              |                                                 | 10              | I                     | 22                   | 1.6                         |
| BusR  |                                                 | 3               |                                                 | 2               | I                     | 4                    | 1.3                         |
| CcpA  |                                                 | 814             |                                                 | 486             | I                     | 30                   | 43.5                        |
| CcpB  |                                                 | 5               |                                                 | 4               | II                    | 9                    | 1.0                         |
| CcpN  |                                                 | 7               |                                                 | 6               | II                    | 9                    | 1.3                         |
| CelR  |                                                 | 13              |                                                 | 1               | II                    | 9                    | 1.6                         |

| TFs   | Predicted site motif in <i>Streptococcaceae</i> |                 | Predicted site motif in <i>Lactobacillaceae</i> |                 | Category <sup>3</sup> | Genomes <sup>4</sup> | Target operons <sup>5</sup> |
|-------|-------------------------------------------------|-----------------|-------------------------------------------------|-----------------|-----------------------|----------------------|-----------------------------|
|       | Motif sequence Logo <sup>1</sup>                | NS <sup>2</sup> | Motif sequence Logo <sup>1</sup>                | NS <sup>2</sup> |                       |                      |                             |
| CopR  |                                                 | 38              |                                                 | 33              | I                     | 30                   | 1.5                         |
| CtsR  |                                                 | 63              |                                                 | 39              | I                     | 25                   | 4.5                         |
| FabT  |                                                 | 47              |                                                 | 12              | I                     | 24                   | 2.2                         |
| FlpA  |                                                 | 4               |                                                 | 31              | II                    | 15                   | 2.3                         |
| FlrR  |                                                 | 3               |                                                 | 6               | II                    | 5                    | 1.8                         |
| FruR  |                                                 | 33              |                                                 | 18              | I                     | 25                   | 1.0                         |
| FucR  |                                                 | 2               |                                                 | 1               | III                   | 2                    | 1.5                         |
| GalR  |                                                 | 20              |                                                 | 28              | I                     | 20                   | 2.3                         |
| GlnR  |                                                 | 57              |                                                 | 33              | I                     | 26                   | 3.6                         |
| GntR1 |                                                 | 6               |                                                 | 26              | I                     | 10                   | 2.1                         |

| TFs  | Predicted site motif in <i>Streptococcaceae</i> |                 | Predicted site motif in <i>Lactobacillaceae</i> |                 | Category <sup>3</sup> | Genomes <sup>4</sup> | Target operons <sup>5</sup> |
|------|-------------------------------------------------|-----------------|-------------------------------------------------|-----------------|-----------------------|----------------------|-----------------------------|
|      | Motif sequence Logo <sup>1</sup>                | NS <sup>2</sup> | Motif sequence Logo <sup>1</sup>                | NS <sup>2</sup> |                       |                      |                             |
| GutR |                                                 | 3               |                                                 | 5               | III                   | 7                    | 1.1                         |
| HrcA |                                                 | 47              |                                                 | 66              | I                     | 29                   | 3.3                         |
| LacR |                                                 | 37              |                                                 | 2               | II                    | 15                   | 2.1                         |
| MalR |                                                 | 77              |                                                 | 8               | I                     | 22                   | 3.7                         |
| MdxR |                                                 | 1               |                                                 | 11              | II                    | 7                    | 1.7                         |
| MleR |                                                 | 8               |                                                 | 20              | I                     | 17                   | 1.7                         |
| MntR |                                                 | 35              |                                                 | 14              | III                   | 22                   | 2.1                         |
| MtaR |                                                 | 69              |                                                 | 2               | II                    | 14                   | 4.5                         |
| MtlR |                                                 | 7               |                                                 | 4               | III                   | 8                    | 1.0                         |
| MurR |                                                 | 4               |                                                 | 4               | II                    | 6                    | 1.0                         |

| TFs  | Predicted site motif in <i>Streptococcaceae</i>                                     |                 | Predicted site motif in <i>Lactobacillaceae</i>                                      |                 | Category <sup>3</sup> | Genomes <sup>4</sup> | Target operons <sup>5</sup> |
|------|-------------------------------------------------------------------------------------|-----------------|--------------------------------------------------------------------------------------|-----------------|-----------------------|----------------------|-----------------------------|
|      | Motif sequence Logo <sup>1</sup>                                                    | NS <sup>2</sup> | Motif sequence Logo <sup>1</sup>                                                     | NS <sup>2</sup> |                       |                      |                             |
| NagR |    | 62              |    | 48              | I                     | 30                   | 2.6                         |
| NiaR |    | 22              |    | 7               | I                     | 18                   | 1.6                         |
| NrdR |    | 59              |    | 80              | I                     | 28                   | 3.0                         |
| NrtR |    | 7               |    | 8               | III                   | 13                   | 1.0                         |
| OglR |    | 1               |    | 2               | II                    | 3                    | 1.0                         |
| PadR |    | 2               |    | 6               | II                    | 6                    | 1.3                         |
| PerR |  | 71              |  | 47              | I                     | 22                   | 4.4                         |
| PflR |  | 28              |  | 3               | III                   | 11                   | 2.8                         |
| PurR |  | 95              |  | 71              | I                     | 30                   | 5.2                         |
| Rex  |  | 160             |  | 70              | I                     | 30                   | 6.0                         |

| TFs  | Predicted site motif in <i>Streptococcaceae</i> |                 | Predicted site motif in <i>Lactobacillaceae</i> |                 | Category <sup>3</sup> | Genomes <sup>4</sup> | Target operons <sup>5</sup> |
|------|-------------------------------------------------|-----------------|-------------------------------------------------|-----------------|-----------------------|----------------------|-----------------------------|
|      | Motif sequence Logo <sup>1</sup>                | NS <sup>2</sup> | Motif sequence Logo <sup>1</sup>                | NS <sup>2</sup> |                       |                      |                             |
| ScrR |                                                 | 26              |                                                 | 32              | I                     | 22                   | 2.1                         |
| SusR |                                                 | 6               |                                                 | 1               | II                    | 5                    | 1.0                         |
| TagR |                                                 | 2               |                                                 | 8               | II                    | 5                    | 2.0                         |
| TreR |                                                 | 15              |                                                 | 20              | II                    | 17                   | 1.7                         |
| UxuR |                                                 | 4               |                                                 | 3               | II                    | 3                    | 2.3                         |
| YwzG |                                                 | 15              |                                                 | 6               | II                    | 18                   | 1.1                         |
| YxeR |                                                 | 2               |                                                 | 17              | II                    | 3                    | 1.0                         |

<sup>1</sup> Sequences Logos were constructed using WebLogo package (<http://weblogo.berkeley.edu/logo.cgi>)

<sup>2</sup> NS. number of binding site sequences used to construct Logo.

<sup>3</sup> Category reflects a conservancy between TFBS motifs in *Streptococcaceae* and *Lactobacillaceae*: I. highly conserved motifs; II. moderately different motifs; III. substantially different motifs.

<sup>4</sup> Number of genomes where current TF regulon was found.

<sup>5</sup> Average number of target operon in regulon per genome.
